# Supplementary figures and images for: Zonal patterning of extracellular matrix and stromal cell populations along a perfusable cellular microchannel
Source: Royal Society of Chemistry journal article supplement (doi:10.1039/d4lc00579a), 2024-01-01

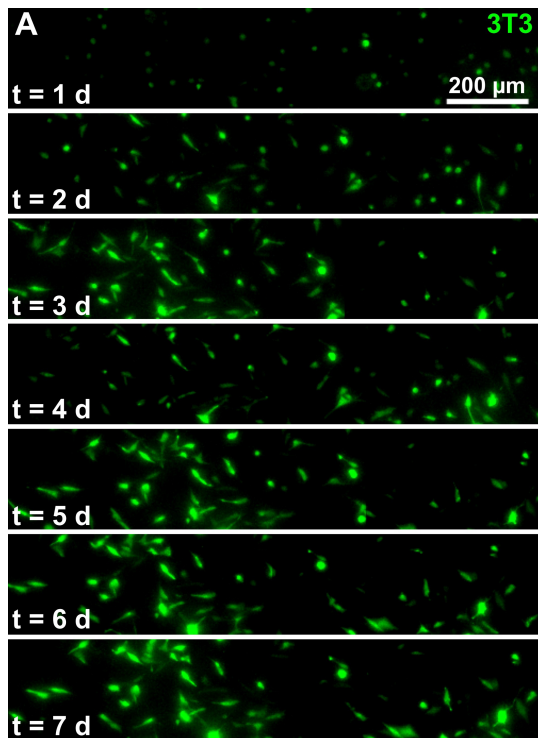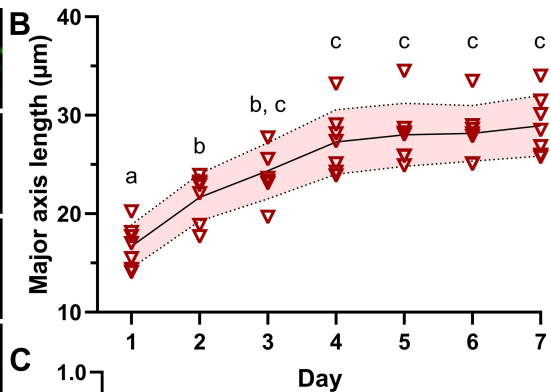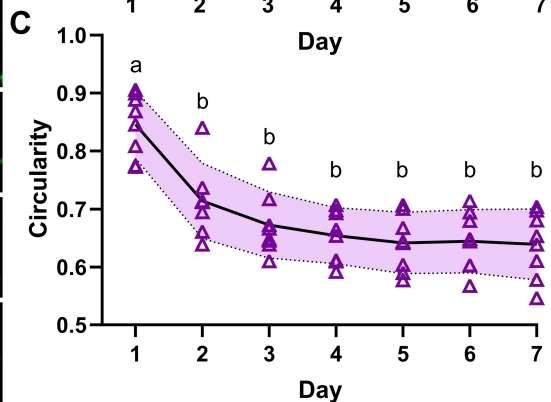

Supplement: d4lc00579a1.pdf [file d4lc00579a1.pdf]

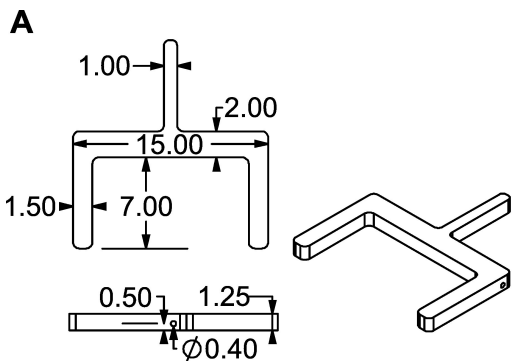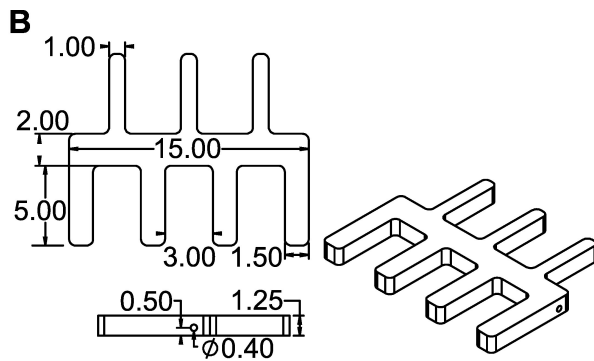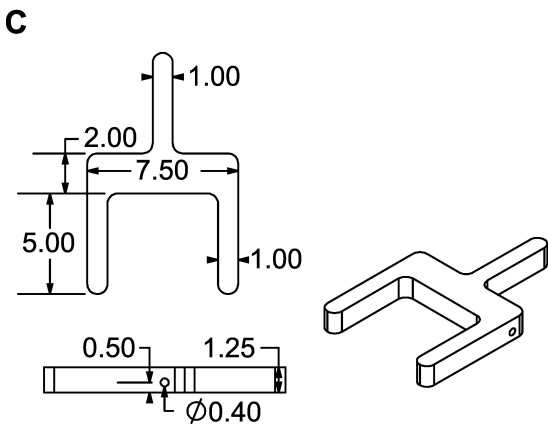

Supplement: d4lc00579a2.pdf [file d4lc00579a2.pdf]
